# Supplementary material for: Meta-analysis of randomised controlled trials comparing latanoprost with brimonidine in the treatment of open-angle glaucoma, ocular hypertension or normal-tension glaucoma
Source: HighWire-hosted journal article supplement (doi:10.1136/bjo.2006.096693), 2006-09-06
Supplement: 91162webappendix3.pdf [file 91162webappendix3.pdf]

## SAS Multiple Regression Appendix C

```
TITLE 'Relationship between WMD and trial duration';
```

```
*      Author      Adrian Fung
      Date        31/3/06
      Purpose     To determine the relationship between WMD of IOPR between latanoprost and
                  brimonidine and trial duration analysed;
```

```
DATA Glaucoma;
```

```
INPUT WMD Duration Design Alloc Treatment;
```

```
DATALINES;
```

|       |     |   |   |   |
|-------|-----|---|---|---|
| 0.6   | 3   | 0 | 0 | 1 |
| 2.6   | 6   | 0 | 1 | 0 |
| -0.3  | 3   | 0 | 1 | 0 |
| 1.3   | 6   | 0 | 1 | 1 |
| 0.69  | 3   | 0 | 0 | 0 |
| 1.9   | 6   | 0 | 0 | 0 |
| -1.17 | 1   | 0 | 0 | 1 |
| 0.13  | 1   | 0 | 1 | 1 |
| 0.8   | 12  | 0 | 1 | 1 |
| 2     | 3   | 0 | 0 | 0 |
| 1.2   | 1   | 1 | 1 | 0 |
| 2     | 1   | 1 | 1 | 0 |
| 2.2   | 1.5 | 1 | 0 | 0 |
| 1.1   | 1.5 | 1 | 0 | 1 |

```
;
```

```
*CODE
```

|                        |   |                     |
|------------------------|---|---------------------|
| Trial design           | 0 | Parallel            |
|                        | 1 | Cross-over          |
| Allocation concealment | 0 | No/NS               |
|                        | 1 | Yes                 |
| Treatment              | 0 | Monotherapy         |
|                        | 1 | Adjunctive therapy* |

```
*Epidemiological study- no potential confounders
```

```
No biologically plausible interactions*;
```

```
PROC PRINT;
```

```
RUN;
```

```
PROC PLOT HPCT=50 VPCT=50;
```

```
PLOT WMD*Duration;
```

```
PROC REG CORR;
```

```
MODEL WMD=Duration Design Alloc Treatment /CLB VIF;
```

```
RUN;
```

Plot of WMD\*Duration. A=1, B=2, etc.

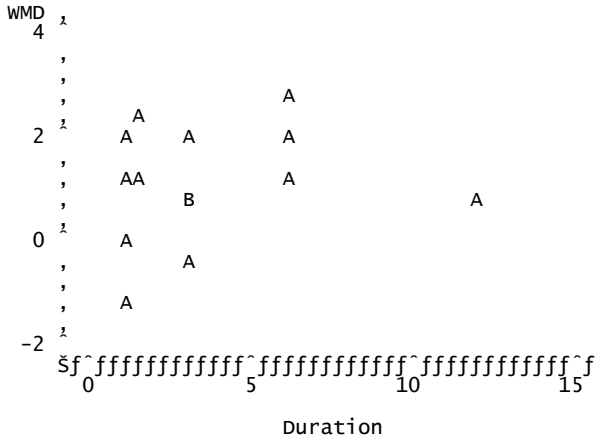

The REG Procedure

Correlation

| Variable  | Duration | Design  | Alloc  | Treatment | WMD     |
|-----------|----------|---------|--------|-----------|---------|
| Duration  | 1.0000   | -0.4762 | 0.2630 | 0.1691    | 0.1845  |
| Design    | -0.4762  | 1.0000  | 0.0000 | -0.2282   | 0.3439  |
| Alloc     | 0.2630   | 0.0000  | 1.0000 | 0.0000    | 0.0290  |
| Treatment | 0.1691   | -0.2282 | 0.0000 | 1.0000    | -0.5266 |
| WMD       | 0.1845   | 0.3439  | 0.0290 | -0.5266   | 1.0000  |

The REG Procedure  
 Model: MODEL1  
 Dependent Variable: WMD

Analysis of Variance

| Source          | DF | Sum of Squares | Mean Square | F Value | Pr > F |
|-----------------|----|----------------|-------------|---------|--------|
| Model           | 4  | 7.52748        | 1.88187     | 2.49    | 0.1174 |
| Error           | 9  | 6.79567        | 0.75507     |         |        |
| Corrected Total | 13 | 14.32315       |             |         |        |

|                |          |          |        |
|----------------|----------|----------|--------|
| Root MSE       | 0.86895  | R-Square | 0.5255 |
| Dependent Mean | 1.07500  | Adj R-Sq | 0.3147 |
| Coeff Var      | 80.83258 |          |        |

Parameter Estimates

| Variable  | DF | Parameter Estimate | Standard Error | t Value | Pr >  t | Variance Inflation | 95% Confidence Limits |
|-----------|----|--------------------|----------------|---------|---------|--------------------|-----------------------|
| Intercept | 1  | 0.69808            | 0.53716        | 1.30    | 0.2260  | 0                  | -0.51706 1.91323      |
| Duration  | 1  | 0.17847            | 0.09288        | 1.92    | 0.0869  | 1.42814            | -0.03164 0.38858      |
| Design    | 1  | 1.07347            | 0.59937        | 1.79    | 0.1069  | 1.35937            | -0.28241 2.42935      |
| Alloc     | 1  | -0.22188           | 0.48687        | -0.46   | 0.6594  | 1.09875            | -1.32324 0.87949      |
| Treatment | 1  | -1.03479           | 0.48333        | -2.14   | 0.0609  | 1.06074            | -2.12816 0.05857      |
